# Supplementary material for: From hydrocarbons to polyols. Cyclooctatetraene to novel cyclooctitolsElectronic supplementary information (ESI) available: spectroscopic characterization. See http://www.rsc.org/suppdata/cc/b2/b208918a/
Source: Royal Society of Chemistry journal article supplement (doi:10.1039/b208918a), 2002-10-28
Supplement: b208918a.doc [file b208918a.doc]

From hydrocarbons to polyols. Cyclooctatetraene to novel cyclooctitols

Goverdhan Mehta,* Kotapalli Pallavi

Department of Organic Chemistry, Indian Institute of Science

Bangalore 560 012, India.

gm@orgchem.iisc.ernet.in

# Supplementary information

Compound (9):

**IR (cm-1):** 1739

**1H NMR (300 MHz, CDCl3)** 6.35-6.28 (m, 1H), 6.20-6.08 (m, 3H), 5.82 (d½ABq, 1H, J=5.1, 9.3Hz), 5.72 (d½ABq, 1H, J=5.7, 9.3Hz), 5.08 (dd, 1H, J=5.1, 2.7Hz), 3.94 (dd, 1H, J=5.7, 8.4 Hz)

**13C NMR (75 MHz, CDCl3)** ****169.40, 133.83, 133.32, 127.32, 126.91, 119.47, 118.93, 72.51, 41.63

**Mass(EI, 70 eV):** *m/z*=149(M++1)

**Compound (10):**

**IR (cm-1):** 3443, 1751

**1H NMR (300 MHz, D2O)**  5.99 (d½ABq, 1H, J=11.4, 4.2Hz), 5.91-5.82 (m, 2H), 5.50 (dd, 1H, J=12.0, 5.1Hz), 4.58 (s, 1H), 4.53 (d, 1H, J=5.1Hz), 4.29 (s, 1H), 3.20 (d, 1H, J=9.3Hz)

**13C NMR (75 MHz, D2O)** 81.15, 135.40, 129.66, 126.50, 125.37, 88.77, 76.27, 72.06, 50.60

**Mass(EI, 70 eV):** *m/z*=182(M+)

Anal. Calcd for C9H10O4: C, 59.34; H, 5.53. Found: C, 59.23; H, 5.48.

Compound (12):

**IR (cm-1):** 1786, 1739

**1H NMR (300 MHz, CDCl3)** 6.14 (½ABq, 1H, J=11.7, 4.5Hz); 6.07-5.98 (m, 2H), 5.67 (dd, 1H, J=12.3, 5.7Hz), 5.51 (d, 1H, J=6Hz), 5.18 (s, 1H), 4.63 (s, 1H), 3.26 (d, 1H, J=9.3 Hz), 2.14 (s, 3H), 2.11 (s, 3H)

**13C NMR (75 MHz, CDCl3)**  174.32, 170.27, 170.07, 130.56, 129.52, 126.56, 124.85, 81.15, 77.74, 74.32, 46.96, 20.87(2C)

**Mass(EI, 70 eV):** *m/z*=266(M+)

**Compound (13):**

.

**IR (cm-1):** 1742

**1H NMR (300 MHz, CDCl3)** 6.12 (d, 2H, J=10.8Hz); 5.64-5.53 (m, 3H); 5.41 (brs, 1H); 5.32 (brs, 1H); 4.30-4.20 (m, 1H); 4.14-4.09 (m, 1H); 3.03 (q, 1H, J=7.8 Hz); 2.08 (s, 3H); 2.04 (s, 3H); 2.03 (s, 3H); 2.01 (s, 3H)

**13C NMR (75 MHz, CDCl3)**  170.85, 170.06, 169.89(2C), 129.71, 128.88, 128.67, 128.06, 71.88, 70.75, 69.83, 63.18, 40.68, 20.94, 20.87, 20.77, 20.73

**Mass(EI, 70 eV):** *m/z*=294(M+-60)

**Compound (15):**

**IR (cm-1):** 1741

**1H NMR (300 MHz, CDCl3)** 5.35-5.30 (m, 2H), 5.17 (td, 1H, J=7.8, 3.6Hz), 3.97 (d½ABq, 1H, J=10.8, 7.8Hz), 3.89 (d½ABq, 1H, J=10.8, 6.6Hz), 2.17-1.86 (m, 3H), 2.09 (s, 3H), 2.08 (s, 3H), 2.04 (s, 3H), 2.02 (s, 3H), 1.75-1.53 (m, 6H)

**13C NMR (75 MHz, CDCl3)** 170.90, 170.10, 170.0, 169.70, 73.74, 72.41, 72.03, 65.32, 40.81, 26.76, 24.15, 23.04, 21.93, 20.96, 20.94, 20.89, 20.84

**Mass(EI, 70 eV):** *m/z*=299(M+-59)

Anal. Calcd for C17H26O8: C, 56.97; H, 7.31. Found C, 56.67; H, 7.34

**Compound (20):**

**IR (cm-1):** 1743

**1H NMR (300 MHz, CDCl3)** 5.92-5.86 (m, 1H), 5.81 (dd, 1H, J=8.4, 3.6Hz), 5.73-5.67 (m, 1H), 5.38 (d, 1H, J=4.8Hz), 5.28 (t, 1H, J=3.6Hz), 3.97 (d½ABq, 1H, J=11.1, 6.3Hz), 3.83 (d½ABq, 1H, J=11.1, 7.8Hz), 2.58-2.47 (m, 1H), 2.34-2.18 (m, 1H), 2.05 (s, 3H); 2.02 (s, 3H); 2.01 (s, 6H), 1.66-1.62 (m, 3H)

**13C NMR (75 MHz, CDCl3)** 170.88, 170.20, 170.01, 169.92, 133.31, 127.07, 74.35, 69.71, 68.30, 67.20, 38.59, 26.63, 25.92, 20.89, 20.86, 20.69(2C)

**Mass(EI, 70 eV):** *m/z*=297(M+-59)

**Compound (22):**

**IR (cm-1):** 1737

**1H NMR (500 MHz, CDCl3)** 5.12 (dd, 1H, J3,2a=11.0, J3,2b=4.0Hz, 3-H); 5.08-5.03 (m, 1H, 1-H), 4.42 (½ABq, 1H, J4,5=9.5Hz, 5-H/4-H), 4.32 (½ABq, 1H, J5,4=9.5Hz, 4-H/5-H), 4.08 (d½ABq, 1H, J5’a,5’b=11.0, J5’a,6=6.5 Hz, 5’-Ha), 3.99 (d½ABq, 1H, J5’b,5’a=11.0, J5’b,6=7.5Hz, 5’Hb), 2.30 (ddd, 1H, J2a,2b=12.5, J2a,3=11.0, J2a,1=5.0Hz, 2-Ha), 2.10 (s, 3H, OAc-H); 2.09 (s, 3H, OAc-H), 2.05 (s, 3H, OAc-H), 2.11-2.04 (m, 1H, 6-H); 1.90-1.74 (m, 4H, 7-Ha, 7-Hb, 2-Hb, 8-Ha), 1.64 (s, 3H), 1.56-1.51 (m, 1H, 8-Hb), 1.37 (s, 3H)

**13C NMR (75 MHz, CDCl3)** 170.86, 170.40, 170.71, 108.55, 78.51, 74.68, 71.01, 70.34, 68.64, 38.36, 33.11, 31.96, 25.51(2C), 23.16, 21.27, 21.20, 20.97

**Mass(EI, 70 eV):** *m/z*=373(M++1)

**Compound (23):**

**IR (cm-1):** 1739

**1H NMR (400 MHz, CDCl3)** 5.28-5.24 (m, 1H, 1-H), 5.16 (d, 1H, J2,1 =9.6Hz, 2-H), 4.41 (½ABq, 1H, J3,4=9.6Hz, 3-H/4-H), 4.29 (½ABq, 1H, J4,3=9.6Hz, 4-H/3-H), 4.06 (d ½ABq, 1H, J4’a,4’b=10.8, J4’a,5=6.8Hz, 4’-Ha), 3.96 (d½ABq, 1H, J4’b,4’a=10.8, J4’b,5=7.6Hz, 4’-Hb), 2.07 (s, 6H, 2 x OAc-H), 1.99 (s, 3H, OAc-H), 1.91-1.88 (m, 2H, 8-Ha, 8-Hb), 1.72-1.56 (m, 3H, 7-Ha, 6-Ha, 5-H), 1.55-1.48 (m, 2H, 7-Hb, 6-Hb), 1.53 (s, 3H), 1.30 (s, 3H)

**13C NMR (75 MHz, CDCl3)** 170.90, 170.60, 170.01, 108.29, 78.63, 74.63, 73.20, 71.83, 68.71, 38.84, 27.78, 25.91, 25.56, 22.75, 21.14, 21.05, 20.99, 19.51

**Mass(EI, 70 eV):** *m/z*=373(M++1)

**Compound (24):**

**IR (cm-1)**: 1737

**1H NMR (500 MHz, CDCl3)** 5.02 (dd, 1H, J3,2a=10.0, J3,2b= 2.5Hz, 3-H), 4.85-4.81 (m, 1H, 1-H), 4.39 (½ABq, 1H, J4,5=9.5Hz, 4-H/5-H), 4.36 (½ABq, 1H, J5,4=9.5Hz, 5-H/4-H), 4.04 (d½ABq, 1H, J5’a,5’b=11.0Hz, J5’a,6=6.0Hz, 5’-Ha), 3.95 (d½ABq, 1H, J5’b,5’a=11.0Hz, J5’b,6=8.0Hz, 5’-Hb), 2.42-2.37 (m, 1H, 2-Ha), 2.11-1.51 (series of m, 6H, 2-Hb, 6-H, 7-Ha, 7-Hb, 8-Ha, 8-Hb), 2.09 (s, 3H, OAc-H), 2.07 (s, 3H, OAc-H), 2.02 (s, 3H, OAc-H), 1.58 (s, 3H), 1.34 (s, 3H)

**13C NMR (75 MHz, CDCl3)** 170.90, 170.14(2C), 108.53, 78.32, 74.37, 71.10, 70.39, 67.90, 53.41, 36.68, 31.37, 25.69, 23.32, 22.06, 21.30, 21.25, 20.96

**Mass(EI, 70 eV):** *m/z*=357(M+-15)

**Compound (28):**

**IR (cm-1):** 1756

**1H NMR (500 MHz, CDCl3)** 5.85 (dd, 1H, J2,3=10.0, J2,1=2.5Hz, 2-H), 5.53 (dd, 1H, J3,2=10.0, J3,4=4.0Hz, 3-H), 5.40 (dd, 1H, J4,3=4.0, J4,5=1.5Hz, 4-H), 5.35-5.32 (m, 1H, 1-H), 5.32 (brs, 1H, 5-H), 3.89 (d½ABq, 1H, J5’a,5’b=11.5, J5’a,6=8.5Hz, 5’-Ha), 3.85 (d½ABq, 1H, J5’b,5’a=11.5, J5’b,6=6.5Hz, 5’-Hb), 2.45-2.39 (m, 1H, 8-Ha), 2.26-2.22 (m, 1H, 6-H), 2.15 (s, 3H, OAc-H), 2.10 (s, 3H, OAc-H), 2.06 (s, 3H, OAc-H), 2.03 (s, 3H, OAc-H), 2.01 (s, 3H, OAc-H), 1.99 (s, 3H, OAc-H), 1.73-1.57 (m, 3H, 7-Ha, 7-Hb, 8-Hb).

**13C NMR (75 MHz, CDCl3)** 170.70, 170.20, 170.10, 169.80(2C), 169.80, 72.30, 71.30, 70.75, 69.91, 69.55, 64.76, 42.37, 29.69, 28.65, 20.97, 20.87, 20.79, 20.71, 20.46, 20.20

**Mass(EI, 70 eV):** *m/z*=475(M++1).

**Compound (29):**

**IR (cm-1):** 1746

**1H NMR (400 MHz, CDCl3)** 5.49 (brs, 1H, 5-H); 5.37-5.34 (m, 2H, 3-H, 2-H), 5.28-5.24 (m, 2H, 4-H, 1-H), 4.00-3.90 (m, 2H, 5’-Ha, 5’-Hb); 2.70-2.60 (m, 1H, 8-Ha); 2.30-2.20 (m, 1H, 6-H), 2.14 (s, 3H, OAc-H), 2.08 (s, 3H, OAc-H); 2.07 (s, 6H, 2 x OAc-H), 2.05 (s, 3H, OAc-H), 2.03 (s, 3H, OAc-H), 2.2-2.0 (m, 1H, 7-Ha), 1.85-1.76 (m, 1H, 8-Hb), 1.75-1.6 (m, 1H, 7-Hb)

**13C NMR (75 MHz, CDCl3)** 170.86, 169.94(2C), 169.84, 169.48, 169.33, 77.18, 72.71, 71.18(2C), 70.21, 65.68, 37.19, 25.99, 21.66, 20.91, 20.87, 20.82, 20.74, 20.69(2C).

**Mass(EI, 70 eV):** *m/z*=415(M+-59).

## Compound (32):

**IR (cm-1):** 3387

**1H NMR (500 MHz, D2O)**  4.54 (dd, 1H, J2,3=9.5, J2,1=3.0Hz, 2-H); 4.20 (brs, 2H, 5-H, 7-H); 4.00 (d, 1H, J4,3=3.5Hz, 4-H); 3.83 (dd, 1H, J3,2=9.5, J3,4=3.5Hz, 3-H); 3.79-3.77 (m, 1H, 1-H); 3.76 (dd, 1H, J7’a,7’b=10.5, J7’a,8=4.0Hz, 7’-Ha); 3.63 (t, 1H, J6,5 =J6,7 =3.5Hz, 6-H ); 3.58 (dd, 1H, J7’a,7’b=10.5, J7’b,8 =8.5Hz, 7’-Hb); 1.66 (ddd as dt, 1H, J8,7’b=J8,1=8.5, J8,7’a=4.0Hz, 8-H)

**13C NMR (75 MHz, D2O)** 80.59, 75.25, 74.47, 72.94, 72.81, 71.73, 69.49, 63.80, 46.46

**Mass (ES):** *m/z*=277(M ++Na)

**Crystallographic information :**

**Crystal data for the compound 21:** Chemical formula C12 H20 O4. Formula weight 228.28. Structure was solved by direct methods (SIR92). Refinement was by full-matrix least-squares procedures on F2 using SHELXL-97. Crystal system: monoclinic, space group: P2(1)/n, cell parameters: a = 8.8968(2)Å, b = 14.340(3) Å, c=19.652(5) Å, β=102.26(6)o, V=2450.22 Å3, Z=8, ρ(cald.)=1.238 gcm-3, F(000)=992.0, μ=0.09 mm-1, λ=0.71 Å . R1 = 0.0946 for 2482 Fo > 4sig(Fo) and 0.1840 for all 4718 data;

ORTEP diagram for compound **21**

**
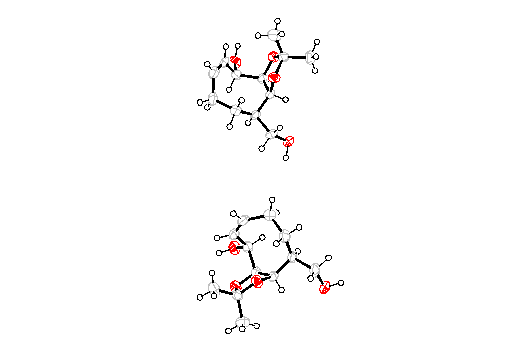
**

wR2.0.2193, GooF = 1.029, Restrained GooF = 1.029 for all data. Temperature 293(2) K. CCDC No.193886. An ORTEP drawing of compound **21** with 50% ellipsoidal probability is shown below. There are two independent molecules in asymmetric unit.


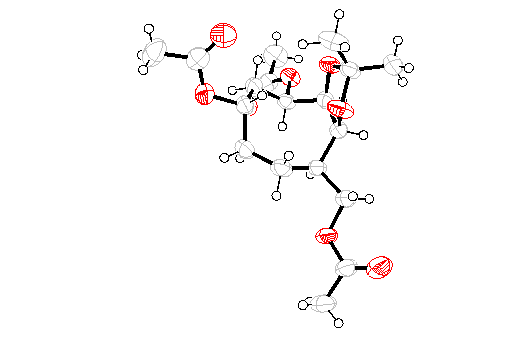
**Crystal data for the compound 22:** Chemical formula C18 H28 O8 . Formula weight 372.4. Structure was solved by direct methods (SIR92). Refinement was by full-matrix least-squares procedures on F2 using SHELXL-97. Crystal system: triclinic, space group: P-1, cell parameters: a = 7.717(1) Å, b = 11.486(2) Å, c = 11.71 (2) Å; α = 76.515(4)o, β = 74.547(4)o, γ = 85.394(4)o ; V = 979.6 Å3, Z = 2, ρ(cald.) = 1.27 gcm-3 , F(000) = 400.0, μ = 0.1 mm-1, λ = 0.71 Å . R1 = 0.0531 for 2082 Fo > 4sig(Fo) and 0.1189 for all 44173 data; wR2 = 0.1183, GooF = 0.881, Restrained GooF = 0.881 for all data. Temperature 293(2) K. CCDC No.193887. An ORTEP drawing of compound **22** with 50% ellipsoidal probability is shown below:

ORTEP diagram for compound **22**

**Crystal data for the compound 23:** Chemical formula C18 H28 O8. Formula weight 372.4. Structure was solved by direct methods (SIR92). Refinement was by full-matrix least-squares procedures on F2 using SHELXL-97. Crystal system: orthorhombic, space group: Pccn, cell parameters: a = 19.052(8) Å, b = 26.424(12) Å, c = 7.686(3) Å, V = 3869.64Å3, Z = 8, ρ(cald) =1.251gcm-3, F(000 )= 1554.0, μ = 0.10 mm-1, λ = 0.71073 Å . Total number of l.s. parameters = 347. R1 = 0.0483 for 2836 Fo > 4sig(Fo) and 0.0665 for all 3965 data. wR2 = 0.1361, GooF = 0.987, Restrained GooF = 0.987for all data. Temperature 293(2) K. CCDC No.193888.An ORTEP
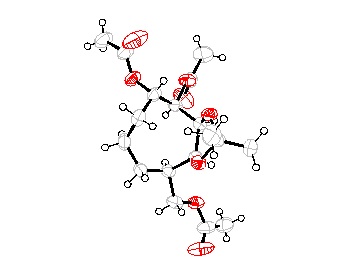
drawing of compound **23** with 50% ellipsoidal probability has shown below.

ORTEP diagram for compound **23**

**Crystal data for the compound 28:** Chemical formula C21 H30 O12. Formula weight 474.45.Structure was solved by direct methods (SIR92). Refinement was by full-matrix least-squares procedures on F2 using SHELXL-97. Crystal system: monoclinic, space group: P2(1)/c, cell parameters: a = 14.2283(2) Å, b = 7.950(1) Å, c = 7.950(4) Å, β = 107.296(3)o, V = 2393.65 Å3, Z = 4, ρ(cald) = 1.317gcm-3, F(000 )= 1008.0, μ = 0.11 mm-1, λ = 0.71073 Å . Total number of l.s. parameters = 304. R1 = 0.0609 for 3649 Fo > 4sig(Fo) and 0.0762 for all 4872 data. wR2 = 0.1761, GooF = 1.050, Restrained GooF = 1.050 for all data. Temperature 293(2) K. CCDC No.193889. An ORTEP drawing of compound **28** with 50% ellipsoidal probability has shown below.


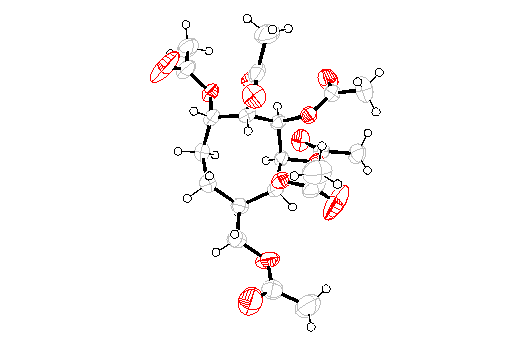


ORTEP diagram for compound **28**
